# Supplementary material
Source: publisher figshare collection journal article supplement (https://acs.figshare.com/ndownloader/files/6025296)
Supplement: Supplementary file 1 [file 6025296]

38
compound 1'
C       1.16911     1.13072    -0.08739
C      -1.23250     2.47838    -0.23597
C       1.22111     2.48427    -0.23632
C      -1.17402     1.12510    -0.08704
C      -2.35191     0.23964    -0.29099
C       2.35116     0.25095    -0.29179
C       0.00861    -3.50102     1.21892
C      -0.00770     3.33434     0.00788
C      -0.00898     3.96042     1.42745
C      -3.20853    -1.96323    -0.62260
C       3.21813    -1.94782    -0.62392
C      -3.75094     0.80185    -0.34757
C       3.74740     0.81994    -0.34936
H       2.13698     2.98417    -0.53288
H      -2.15081     2.97392    -0.53231
H      -0.87026    -4.12703     0.99139
H       0.01502    -3.39824     2.31688
H       0.88404    -4.12812     0.98129
H      -0.00983     4.17616    -0.70222
H      -0.00716     3.17564     2.19204
H      -0.89985     4.58402     1.57862
H       0.87913     4.58798     1.57846
H      -2.80174    -2.97301    -0.71331
H      -3.76988    -1.73192    -1.53740
H      -3.91884    -1.95651     0.21566
H       2.81606    -2.95947    -0.71490
H       3.92871    -1.93816     0.21410
H       3.77807    -1.71353    -1.53883
H      -4.40317     0.26006     0.34751
H      -4.18107     0.67492    -1.34908
H      -3.78573     1.85808    -0.08463
H       4.40317     0.28036     0.34409
H       3.77734     1.87596    -0.08499
H       4.17681     0.69654    -1.35163
Mn      0.00448    -1.63261     0.21409
N      -0.00077     0.43720     0.15490
N      -2.10722    -1.02781    -0.41470
N       2.11252    -1.01768    -0.41518


38
compound 1'ox
C       0.61505    -1.47831     0.05607
C      -2.16377    -1.55782     0.30366
C       0.05910    -2.68739     0.31280
C      -1.51128    -0.39729     0.05089
C      -2.10258     0.94767     0.02350
C       2.05176    -1.16684     0.01849
C      -1.44163    -2.88825     0.28780
C      -1.87202    -3.74650    -0.93193
C      -1.72935     3.31276    -0.17342
C       3.73885     0.53571    -0.22992
C      -3.57941     1.18440     0.11515
C       3.10413    -2.22883     0.14246
C       1.61207     3.18309     0.04605
H       0.67326    -3.55621     0.52106
H      -3.22873    -1.57067     0.50685
H      -1.73506    -3.45747     1.18394
H      -1.60835    -3.24546    -1.86905
H      -2.95513    -3.91351    -0.92027
H      -1.37439    -4.72273    -0.90787
H      -0.89211     3.98060    -0.36553
H      -2.20204     3.60814     0.77035
H      -2.46209     3.42763    -0.97929
H       3.78609     1.48603    -0.76037
H       4.35738    -0.19186    -0.76109
H       4.15083     0.68199     0.77574
H      -3.81090     1.85112     0.95354
H      -4.13638     0.25763     0.24193
H      -3.94086     1.67757    -0.79548
H       3.83991    -1.95800     0.90628
H       3.64372    -2.34375    -0.80571
H       2.67485    -3.19532     0.40155
H       1.56861     3.76452    -0.88631
H       2.66386     3.10346     0.34495
H       1.08898     3.75451     0.82492
Mn      0.72608     1.36887    -0.18767
N      -0.14427    -0.34116    -0.16989
N      -1.24292     1.92987    -0.10177
N       2.34007     0.10143    -0.14465

76
Compound 3'
C       0.44684    -1.24547    -0.65000
C       0.44704     1.24544    -0.64992
C       1.92966     1.19544    -0.32596
C       0.10634     0.00004    -1.50853
C       1.92946    -1.19574    -0.32603
C      -0.44706    -1.24544     0.64997
C      -0.44685     1.24547     0.65005
C      -1.92947     1.19574     0.32607
C      -0.10635    -0.00004     1.50858
C      -1.92967    -1.19544     0.32600
C       2.79240     2.30275    -0.01556
C       2.79202    -2.30318    -0.01570
C      -2.79241    -2.30275     0.01555
C      -2.79202     2.30318     0.01571
C       6.46528     0.00112    -0.93949
C      -6.46525    -0.00114     0.93952
C       4.92119    -3.13345     0.73508
C       2.32479    -3.72708    -0.20133
C       4.92167     3.13257     0.73545
C       2.32546     3.72673    -0.20130
C      -0.79174    -0.00003     2.88146
C       0.79172     0.00002    -2.88141
C      -4.92165    -3.13254    -0.73555
C      -2.32548    -3.72673     0.20126
C      -4.92116     3.13344    -0.73514
C      -2.32479     3.72708     0.20134
H       0.20622    -2.14643    -1.22728
H       0.20658     2.14648    -1.22714
H      -0.97198     0.00014    -1.69305
H      -0.20660    -2.14649     1.22719
H      -0.20623     2.14643     1.22733
H       0.97197    -0.00014     1.69310
H       6.32990     0.01448    -2.03341
H       7.08448    -0.88519    -0.72676
H       7.09311     0.87626    -0.70655
H      -7.08438     0.88527     0.72700
H      -6.32982    -0.01474     2.03342
H      -7.09318    -0.87618     0.70642
H       4.52243    -3.81805     1.49807
H       5.86211    -2.72516     1.11390
H       5.15668    -3.73696    -0.15506
H       1.30738    -3.78215    -0.59013
H       2.35821    -4.28108     0.74518
H       2.98113    -4.26023    -0.90070
H       4.52311     3.81708     1.49862
H       5.15715     3.73622    -0.15461
H       5.86257     2.72404     1.11405
H       1.30804     3.78198    -0.59003
H       2.98187     4.25967    -0.90076
H       2.35907     4.28082     0.74515
H      -1.88350     0.00007     2.80466
H      -0.49496     0.88520     3.45751
H      -0.49512    -0.88535     3.45745
H       0.49510     0.88534    -3.45740
H       0.49494    -0.88521    -3.45746
H       1.88348    -0.00008    -2.80461
H      -5.86256    -2.72401    -1.11413
H      -5.15711    -3.73626     0.15447
H      -4.52308    -3.81700    -1.49877
H      -2.98191    -4.25969     0.90070
H      -1.30807    -3.78199     0.59002
H      -2.35907    -4.28080    -0.74521
H      -5.86209     2.72515    -1.11394
H      -4.52239     3.81800    -1.49817
H      -5.15664     3.73701     0.15496
H      -2.98114     4.26024     0.90069
H      -2.35820     4.28107    -0.74518
H      -1.30739     3.78215     0.59014
Mn      4.63265    -0.00043     0.10784
Mn     -4.63264     0.00044    -0.10785
N       2.52883    -0.00019    -0.24034
N      -2.52884     0.00019     0.24038
N      -4.00789     2.03267    -0.45589
N      -4.00815    -2.03199    -0.45620
N       4.00816     2.03200     0.45616
N       4.00790    -2.03267     0.45588

76
compound 3'ox
C       0.43491    -1.25114    -0.59282
C       0.43409     1.24821    -0.59308
C       1.91010     1.19725    -0.26705
C       0.10758    -0.00162    -1.45541
C       1.91030    -1.19915    -0.26349
C      -0.46853    -1.24891     0.70198
C      -0.46656     1.24596     0.70415
C      -1.94407     1.19770     0.35688
C      -0.14105    -0.00265     1.56543
C      -1.94489    -1.19699     0.35034
C       2.83816     2.28060    -0.09882
C       2.83687    -2.28183    -0.08120
C      -2.80472    -2.30428     0.02894
C      -2.80563     2.30786     0.04963
C       6.48914    -0.00054    -0.26833
C      -6.52485    -0.01182     0.80029
C      -4.92511    -3.12334    -0.75823
C      -2.35039    -3.72937     0.23335
C      -2.35186     3.73121     0.26725
C      -4.92957     3.13319    -0.72123
C      -0.85637    -0.00307     2.92313
C       0.80548    -0.00172    -2.82152
C       2.38504    -3.71343    -0.13111
C       5.09326    -3.03025     0.38119
C       5.09795     3.03514     0.32784
C       2.38483     3.71164    -0.14426
H       0.20851    -2.15288    -1.17198
H       0.20585     2.14949    -1.17217
H      -0.96819    -0.00211    -1.64559
H      -0.23706    -2.15002     1.28178
H      -0.23124     2.14569     1.28453
H       0.93208    -0.00390     1.78104
H       6.74434     0.86058    -0.89714
H       6.77435    -0.91779    -0.79594
H       7.06810     0.06254     0.66333
H      -6.72303     0.88835     1.40248
H      -6.67403    -0.87121     1.47233
H      -7.34220    -0.06464     0.06117
H      -5.84608    -2.71124    -1.17891
H      -5.19894    -3.70297     0.13632
H      -4.50714    -3.82819    -1.49120
H      -3.03564    -4.25849     0.90705
H      -1.34945    -3.79017     0.66249
H      -2.34951    -4.28405    -0.71326
H      -3.03890     4.25421     0.94385
H      -2.34892     4.29419    -0.67448
H      -1.35208     3.78867     0.69951
H      -5.85020     2.72492    -1.14639
H      -4.51320     3.84775    -1.44560
H      -5.20377     3.70119     0.18066
H      -1.94535    -0.00298     2.82142
H      -0.57148     0.88197     3.50452
H      -0.57161    -0.88865     3.50375
H       0.51432     0.88353    -3.39863
H       0.51297    -0.88643    -3.39881
H       1.89800    -0.00265    -2.74152
H       1.32836    -3.79687    -0.38458
H       2.54077    -4.19925     0.83978
H       2.96489    -4.27961    -0.86877
H       4.75731    -3.71713     1.16631
H       6.03541    -2.58431     0.69950
H       5.28212    -3.61409    -0.52904
H       4.80965     3.67364     1.17147
H       5.20892     3.66992    -0.56042
H       6.06773     2.59148     0.55112
H       1.31526     3.79303    -0.33689
H       2.92082     4.26528    -0.92396
H       2.59932     4.21224     0.80748
Mn      4.50178    -0.00024     0.12052
Mn     -4.63452     0.00134    -0.13027
N       2.49036    -0.00058    -0.12946
N      -2.53804     0.00087     0.25843
N      -4.00996     2.03570    -0.44538
N      -4.00727    -2.02790    -0.46849
N       4.12095     1.96890     0.10339
N       4.11582    -1.96822     0.14066
